# Supplementary material
Source: PubMed Central journal article supplement (PMC2949013)
Supplement: pp.110.162123_4.pdf [file pp.110.162123_4.pdf]

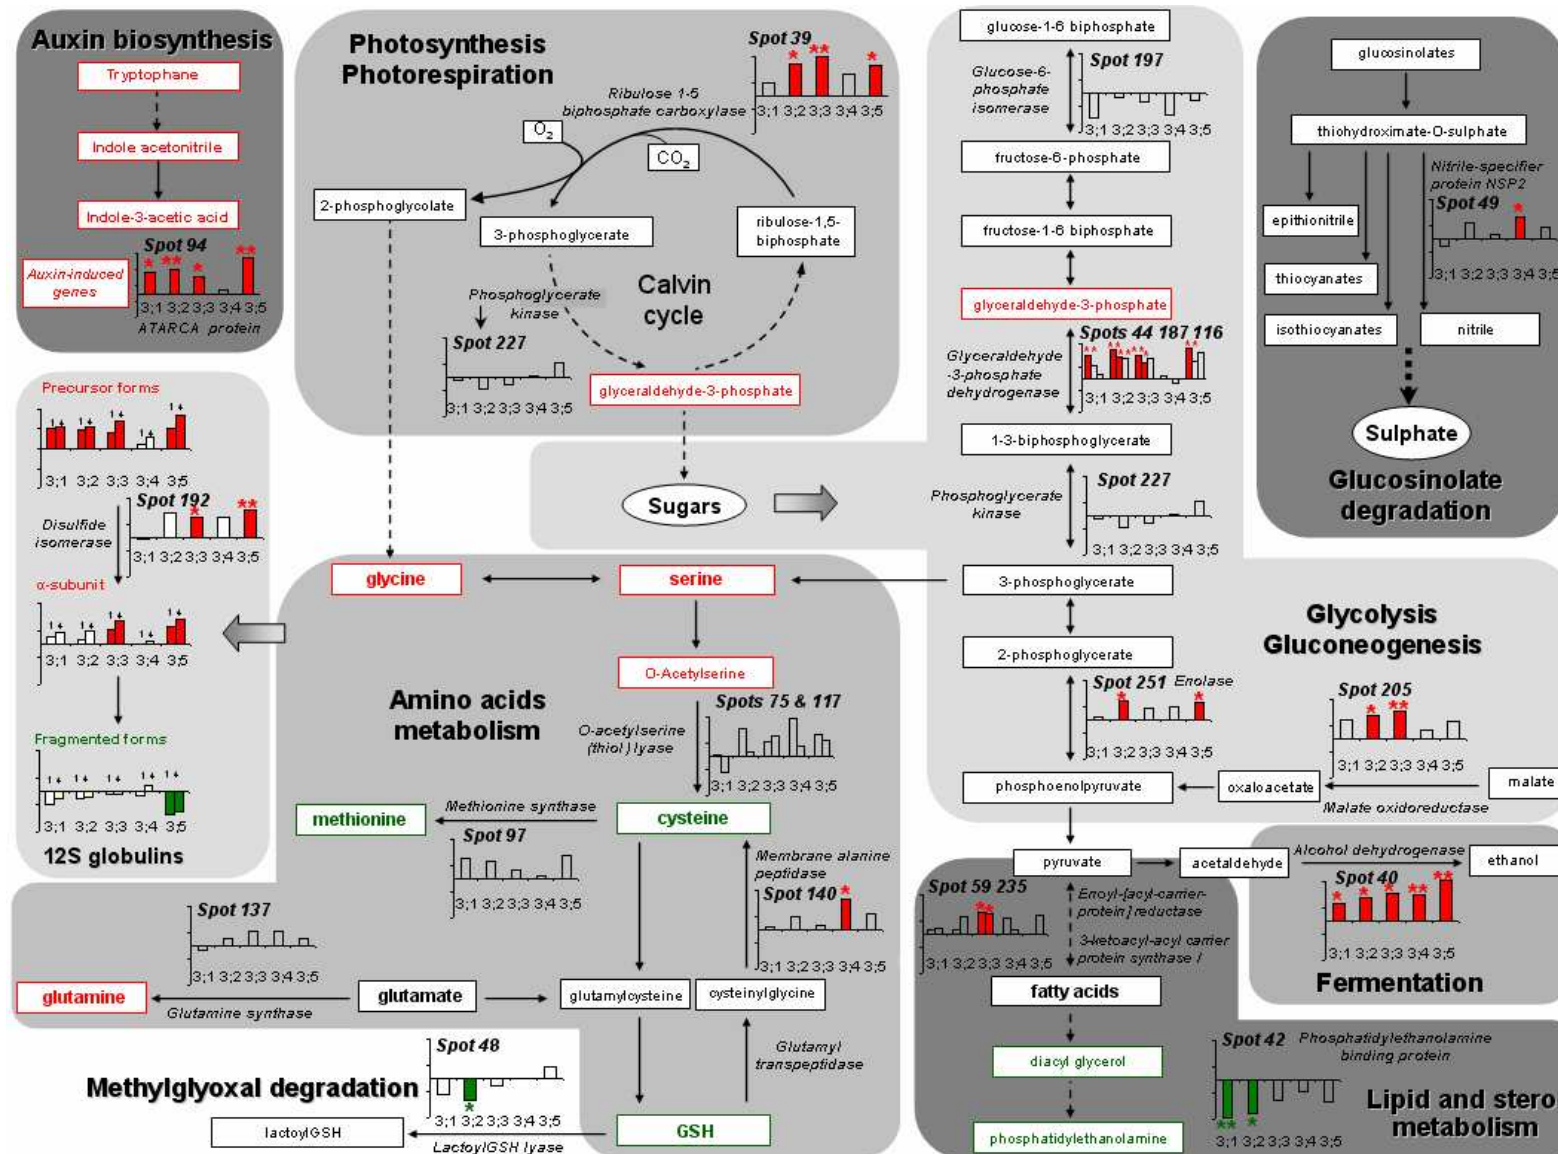

**Supplemental Figure S5. Main metabolic pathways affected in the *SULTR3* mutants.** The proteins were related to their metabolic pathways according to protein annotation (<http://www.arabidopsis.org>), ontological classification (Bevan et al., 1998) and established features of seed metabolism (Catusse et al., 2008). The bars indicate protein abundance variation in mature seeds of the mutants versus wild-type (log<sub>2</sub> volume ratios in mutant seeds versus wild-type seeds). Significant variations ( $p < 0.05$ ) are represented by red (increase) or green (decrease) bars. For 12S globulins, bars represent volume mean of spots corresponding to At12S1 or At12S4 (log<sub>2</sub> volume ratios versus wild-type). The metabolites differentially accumulated during sulfate deprivation in *Arabidopsis* plants (Nikiforova et al., 2005), are shown in red (increased levels) or in green (decreased levels). \* and \*\* indicate statistically significant variations with  $p < 0.05$  and  $p < 0.01$ , respectively. GSH, glutathione.
